# Supplementary material for: Identification of PKD2 mutations in human preimplantation embryos in vitro using a combination of targeted next-generation sequencing and targeted haplotyping
Source: PubMed Central journal article supplement (PMC4858692; doi:10.1038/srep25488), 2016-05-06
Supplement: srep25488-s1.pdf [file srep25488-s1.pdf]

**Identification of *PKD2* mutations in human preimplantation embryos *in vitro* using a combination of targeted next-generation sequencing and targeted haplotyping**

Song-Chang Chen<sup>1,2†</sup>, Xiao-Li Xu<sup>3,4†</sup>, Jun-Yu Zhang<sup>1,2</sup>, Guo-Lian Ding<sup>1,2</sup>, Li Jin<sup>1,2</sup>, Bei Liu<sup>5</sup>, Dong-Mei Sun<sup>3,4</sup>, Chang-Lin Mei<sup>6</sup>, Xiao-Nan Yang<sup>3,4</sup>, He-Feng Huang<sup>1,2,5</sup>, Chen-Ming Xu<sup>1,2,5,\*</sup>

1. Institute of Embryo-Fetal Original Adult Disease Affiliated to Shanghai Jiao Tong University School of Medicine, 910 Hengshan Road, Shanghai 200030, P.R. China
2. International Peace Maternity and Child Health Hospital, Shanghai Jiao Tong University School of Medicine, 910 Hengshan Road, Shanghai 200030, P.R. China
3. BGI-Shenzhen, Shenzhen, 518083, P.R. China
4. Hangzhou Genomics Institute, 478 Wensan Road, Hangzhou 310012, P.R. China
5. Key Laboratory of Reproductive Genetics (Zhejiang University), Ministry of Education, 1 Xueshi Road, Hangzhou 310006, P.R. China
6. Division of Nephrology, Kidney Institute of CPLA, Changzheng Hospital, Second Military Medical University, Shanghai, 200003, P.R. China

† These authors contributed equally to this work.

\* Correspondence to: Dr. Chen-Ming Xu, Department of Reproductive Genetics, International Peace Maternity and Child Health Hospital, Shanghai Jiao Tong University School of Medicine, 910 Hengshan Road, Shanghai 200030, P.R. China; Phone: +86 21 64070434-30321; Fax: +86 21 64078219; E-mail: [chenming\\_xu2006@163.com](mailto:chenming_xu2006@163.com)

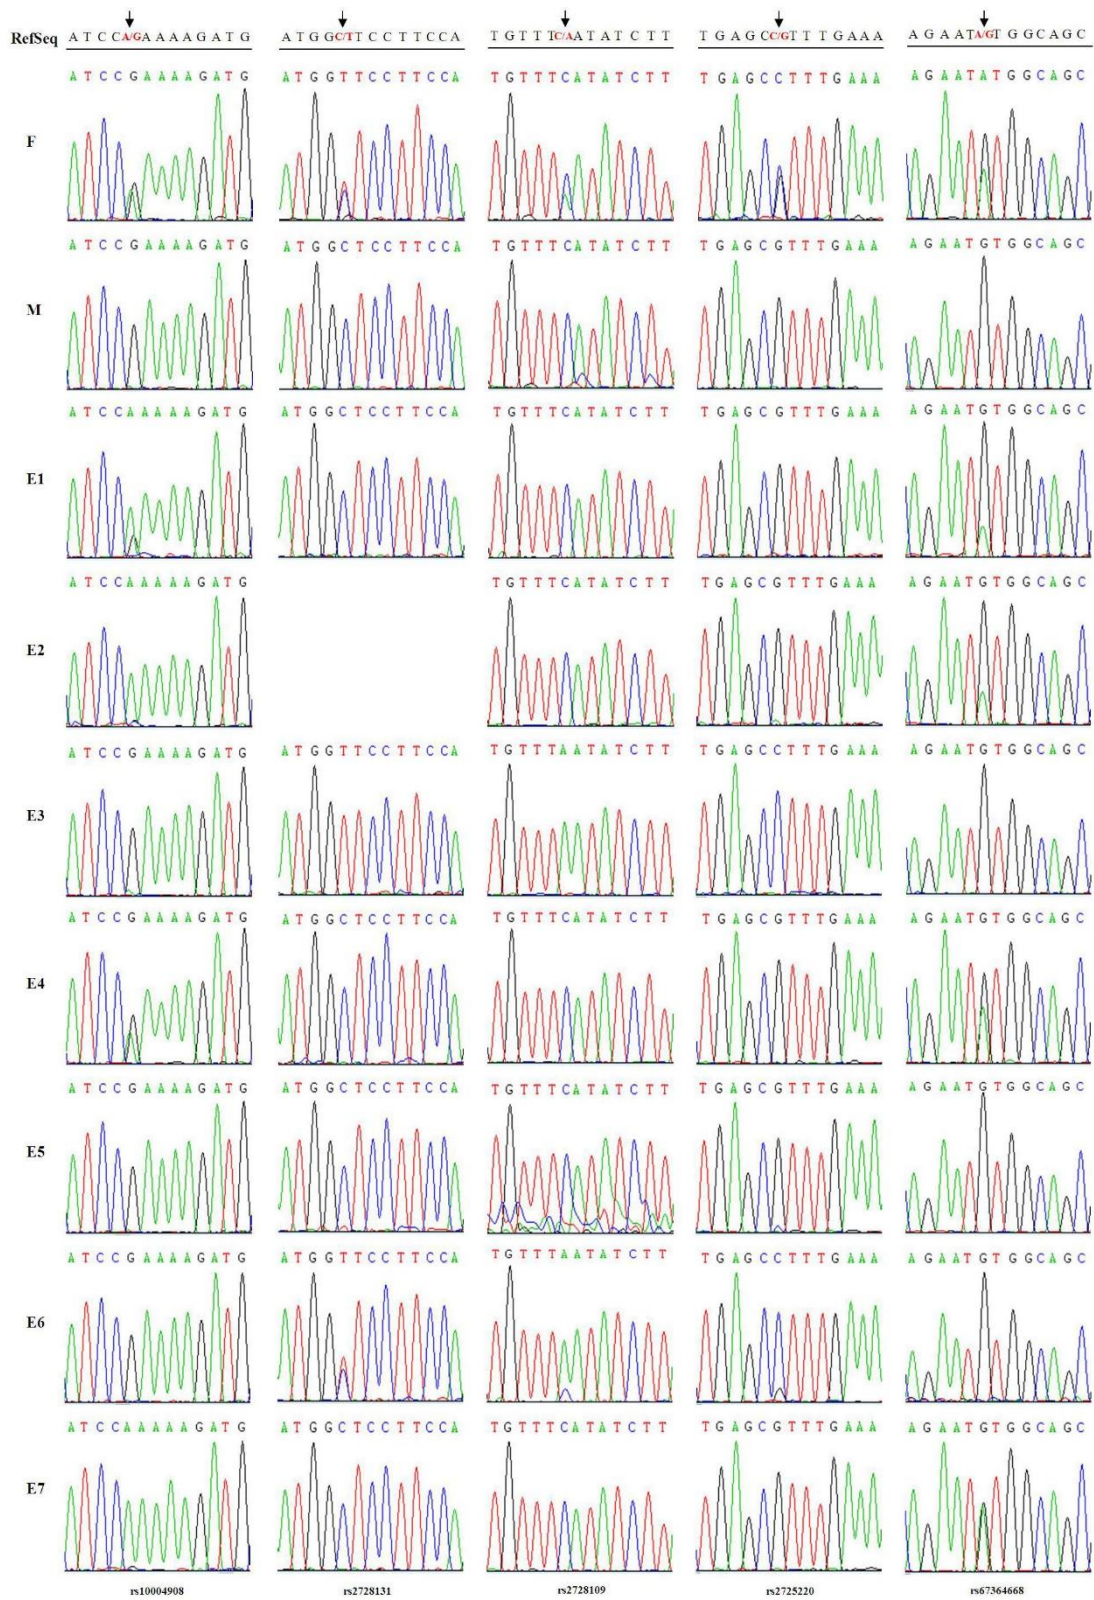

**Supplementary information Figure S1.** Direct detection results in five candidate SNPs by Sanger sequencing.

“F” represents “father”, “M” represents “mother” and “E” represents “embryo”. The arrows indicate the SNP locus. Tests were performed with both peripheral blood and single lymphocytes of the peripheral blood from the father, mother and a single cell obtained from a 6- to 8-cell cleavage-stage embryo on day three after IVF. We did not obtain the results of direct detection in rs2728131 of embryo 2 because of the invalid sequencing peak pattern obtained from Sanger sequencing.

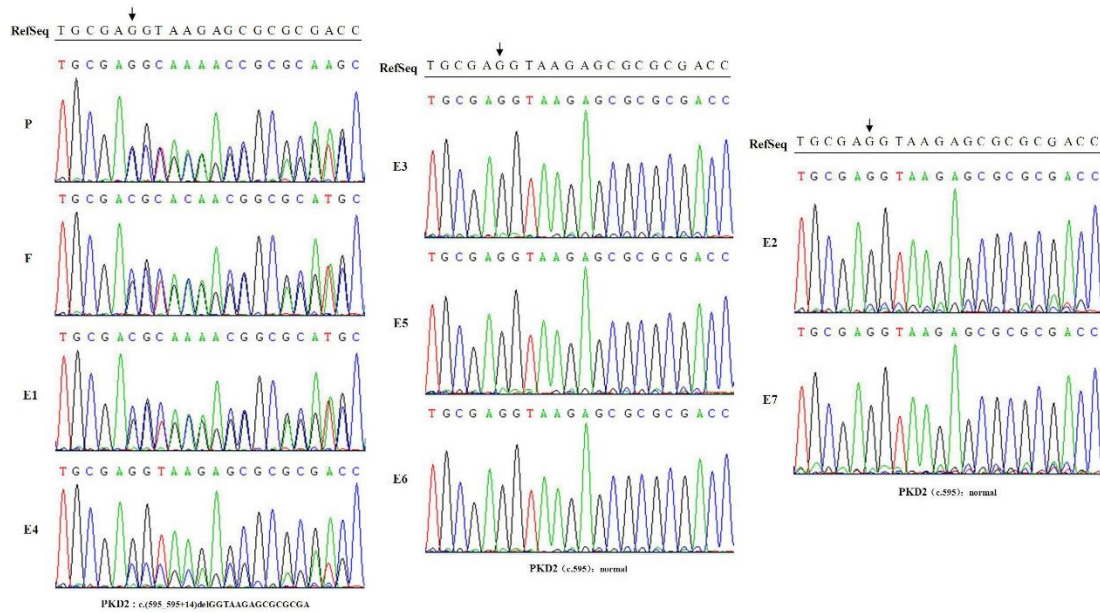

**Supplementary information Figure S2.** Paternal grandmother and embryos by Sanger sequencing.

“P” represents “paternal grandmother”, “F” represents “father” and “E” represents “embryo”. The arrows indicate the loci of the *PKD2* gene (c.595). There were heterozygous deletions in the *PKD2* gene c.595\_595+14delGGTAAGAGCGCGCGA in the paternal grandmother, father, embryo 1 and embryo 4. The direct mutation detection results in the *PKD2* gene (c.595) of embryos 3, 5 and 6 were normal and were consistent with the results of family-specific haplotyping and embryo analysis. The direct mutation detection results in the *PKD2* gene (c.595) of embryos 2 and 6 were also normal but were inconsistent with the results of family-specific haplotyping and embryo analysis.

**Table S1. Sex identification results using NGS.**

|                     | F     | M     | P     | E1    | E2    | E3    | E4    | E5    | E6    | E7    |
|---------------------|-------|-------|-------|-------|-------|-------|-------|-------|-------|-------|
| Mean depth of chr X | 14.89 | 37.25 | 35.85 | 22.43 | 38.69 | 26.83 | 31.35 | 41.36 | 0.12  | 37.13 |
| Mean depth of chr Y | 16.47 | 0.21  | 0.18  | 13.91 | 0.05  | 10.76 | 0.06  | 0.01  | 18.69 | 12.98 |
| Gender test result  | M     | F     | F     | M     | F     | M     | F     | F     | ?     | M     |

Although embryo 6 was considered to be normal with PGD, the NGS data for the sex chromosomes indicated abnormality, which is colored in red. The results illustrated the great risk of having a missing X chromosome, and this finding was confirmed by karyotype analysis (data not shown).

An array-based gene chip was designed to capture all of the exons of 21 genes, approximately 2,000 SNP (Minor Allele Frequency, MAF > 0.3) loci regions around each gene and in the X and Y chromosome-specific regions. In addition to the *PKD2* gene, we used this method to detect other genes within the chip. The following tables show the analyses for two pedigrees:

**Pedigree #1:** The target gene was *DMD* (chr X). Three samples, including the husband (*DMD* normal), wife (*DMD* c.2280delA carried), daughter (*DMD* c.2280delA carried) and five embryos, were tested.

The informative SNPs were substantially and uniformly distributed around the *DMD* gene in all five embryos. See Supplementary information (Table S2). The haplotype analysis of the *DMD* gene in the five embryos was consistent with the results of the multiple fluorescence PCR (MF-PCR) method.

**Table S2. Targeted NGS and haplotype analysis results in the embryos of pedigree #1 with the *DMD* gene.**

| Embryo | Gene       | M           | M           | Haplotype<br>identification | Sex<br>identification | Detection<br>results |
|--------|------------|-------------|-------------|-----------------------------|-----------------------|----------------------|
|        |            | haplotype 1 | haplotype 2 |                             |                       |                      |
| E1     | <i>DMD</i> | 14/36/24    | 0           | M1                          | female                | carried              |
| E2     | <i>DMD</i> | 0           | 10/22/8     | M2                          | male                  | normal               |
| E3     | <i>DMD</i> | 0           | 13/23/9     | M2                          | male                  | normal               |
| E4     | <i>DMD</i> | 0           | 10/23/12    | M2                          | male                  | normal               |
| E5     | <i>DMD</i> | 11/33/21    | 0           | M1                          | male                  | abnormal             |

The proband (daughter) carried disease-causing mutations in the *DMD* gene. “M1” refers to the mother’s haplotype 1, which represents the mutation haplotype.

**Pedigree #2:** The target gene was *PKDI* (chr16). Three samples, including the husband (proband), the proband’s mother, his wife (normal) and four embryos, were tested. Both the proband and his mother carried a heterozygous deletion in P.GLu313Ter(GAG>TAG) of the *PKDI* gene, but the proband’s wife was normal.

Two out of the four embryos had severe amplification bias via WGA, and the overall genomic coverage was low (Table S3). The results of haplotype analysis (Table S4) were consistent with the results of the single-gene genetic disease detection.

**Table S3. Single-gene genetic disease detection of pedigree #2 with the *PKDI* gene in embryos.**

| Embryo | 10× Coverage of target region (%) | Qualification (yes/no) | Detection results |
|--------|-----------------------------------|------------------------|-------------------|
| e1     | 45.12                             | No*                    | -                 |
| e2     | 70.69                             | Yes                    | Abnormal          |
| e3     | 34.03                             | No*                    | -                 |
| e4     | 66.56                             | Yes                    | Normal            |

“\*” represents embryos with severe amplification bias via WGA. The overall genomic coverage was low, and the *PKDI* gene could not be analyzed.

**Table S4. Targeted NGS and haplotype analysis results of pedigree #2 with the *PKD1* gene in embryos.**

| Embryo | Gene        | F1       |            | F2 (P.GLu313Ter) |            | haplotype identification | Detection results |
|--------|-------------|----------|------------|------------------|------------|--------------------------|-------------------|
|        |             | upstream | downstream | upstream         | downstream |                          |                   |
| e2     | <i>PKD1</i> | 0        | 0          | 27               | 6          | F2                       | abnormal          |
| e4     | <i>PKD1</i> | 68       | 27         | 0                | 0          | F1                       | normal            |

“F1” represents a normal haplotype; “F2” represents a mutation haplotype



**Table S5. Sanger DNA sequencing results in five SNP informative loci from peripheral blood and a single lymphocyte from peripheral blood from the father.**

| SNP_ID     | Position | Peripheral<br>blood | Single lymphocyte from peripheral blood |   |    |    |    |    |    |    |    | Rate of | Average |
|------------|----------|---------------------|-----------------------------------------|---|----|----|----|----|----|----|----|---------|---------|
|            |          |                     | 1                                       | 2 | 3  | 4  | 5  | 6  | 7  | 8  | 9  | ADO (%) | ADO (%) |
| rs10004908 | 88807246 | AG                  | A                                       | A | -  | A  | A  | A  | AG | AG | G  | 77.78   |         |
| rs2728131  | 88924344 | TC                  | C                                       | T | C  | CT | CT | CT | CT | C  | C  | 55.56   |         |
| rs2728109  | 88957723 | AC                  | CA                                      | A | A  | C  | CA | C  | C  | CA | C  | 66.67   | 57.78   |
| rs2725220  | 88959922 | CG                  | GC                                      | C | GC | G  | GC | G  | GC | GC | GC | 33.33   |         |
| rs67364668 | 89444528 | AG                  | A                                       | G | G  | G  | A  | AG | AG | AG | AG | 55.56   |         |
